# Supplementary material
Source: PubMed Central journal article supplement (PMC2777396)
Supplement: 00144.2009_6.pdf [file 00144.2009_6.pdf]

## Appendix

Table 1.

Effects of PMA on Steady-State Inactivation Kinetics in Kv4.3-S and Kv4.3-L

|                | $A\tau_{\text{slow}}$ | $A\tau_{\text{fast}}$ |          |
|----------------|-----------------------|-----------------------|----------|
| Kv4.3-S        | 0.40±0.03             | 0.60±0.03             | p=0.31   |
| PMA            | 0.38±0.03             | 0.62±0.03             | n = 9    |
|                |                       |                       |          |
| Kv4.3-L        | 0.35±0.01             | 0.65±0.01             | p=0.036  |
| PMA            | 0.39±0.01             | 0.61±0.01             | n = 9    |
|                |                       |                       |          |
| Kv4.3-L[T504A] | 0.39±0.02             | 0.61±0.02             | p = 0.32 |
| PMA            | 0.41±0.03             | 0.59±0.03             | n = 8    |
|                |                       |                       |          |
| Kv4.3-S        | 0.36±0.04             | 0.64±0.04             | p=0.30   |
| PKC            | 0.39±0.03             | 0.61±0.03             | n = 7    |
|                |                       |                       |          |
| Kv4.3-L        | 0.39±0.01             | 0.61±0.01             | p = 0.50 |
| PKC            | 0.40±0.02             | 0.60±0.02             | n = 6    |
|                |                       |                       |          |
| PKC-L[T504A]   | 0.37±0.03             | 0.63±0.03             | p =0.26  |
| PKC            | 0.39±0.03             | 0.61±0.03             | n = 6    |
|                |                       |                       |          |
| PKC-L[T503D]   | 0.40±0.01             | 0.60±0.01             | p = 0.74 |
| PKC            | 0.40±0.02             | 0.60±0.02             | n = 11   |
