# Supplementary material
Source: PubMed Central journal article supplement (PMC2777396)

# Supplement Figure 1

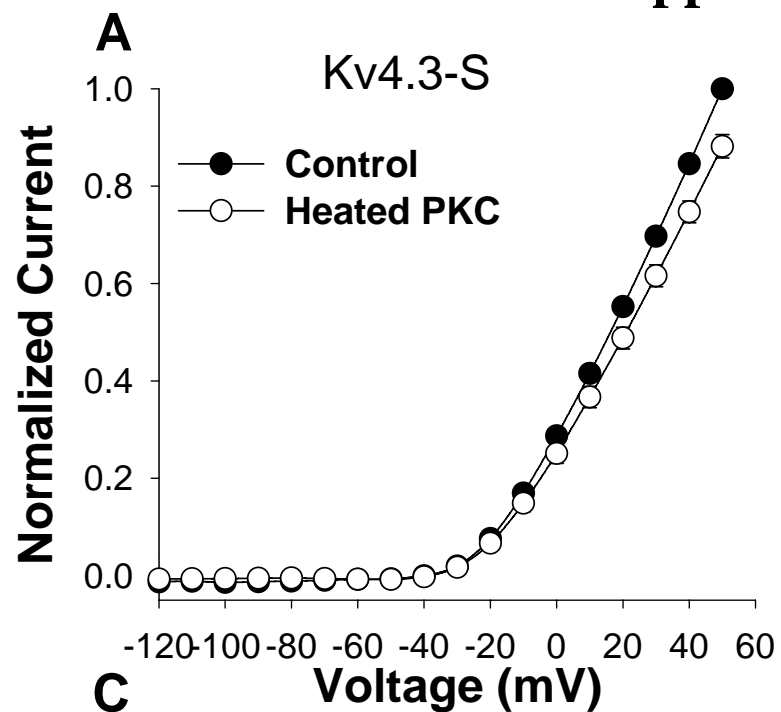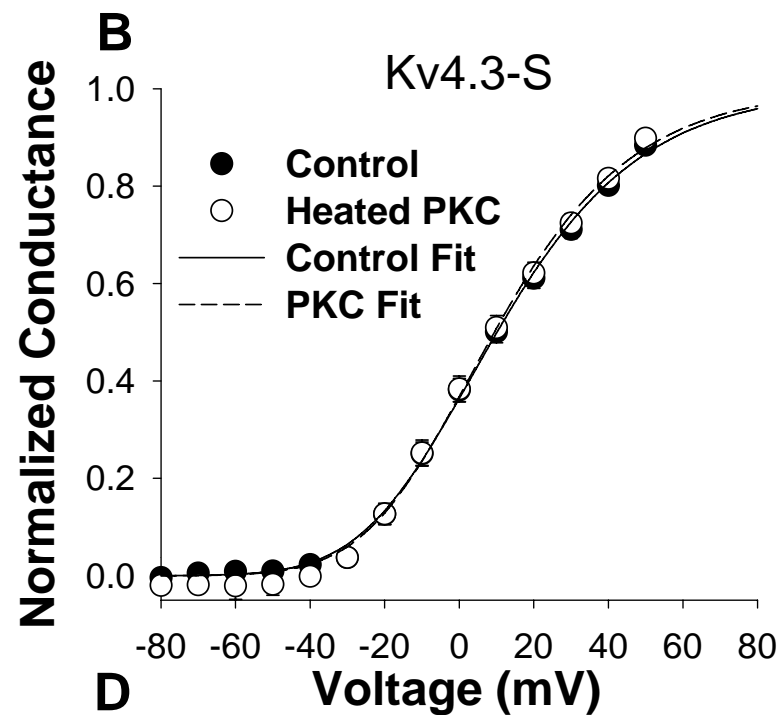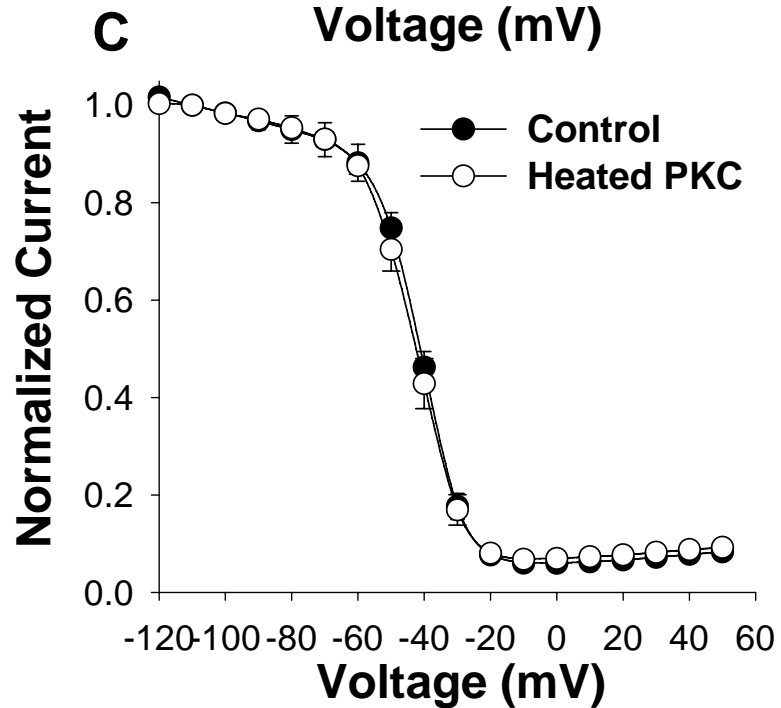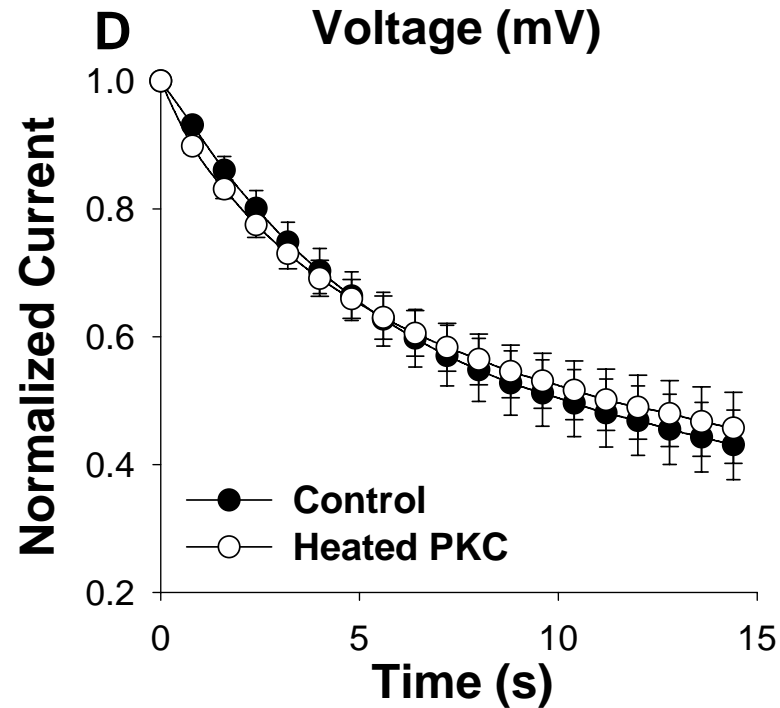

Supplement: 00144.2009_1.pdf [file 00144.2009_1.pdf]

## Supplement Figure 2

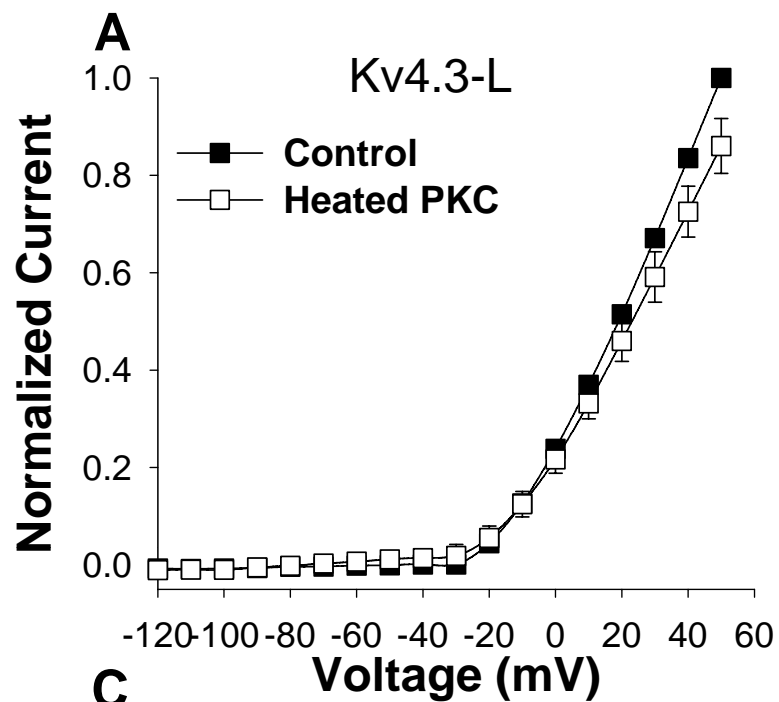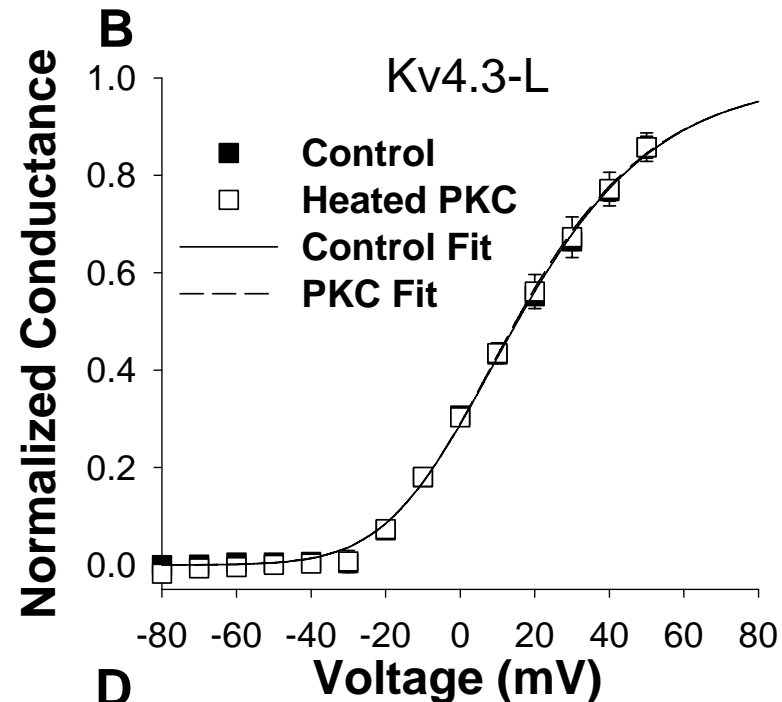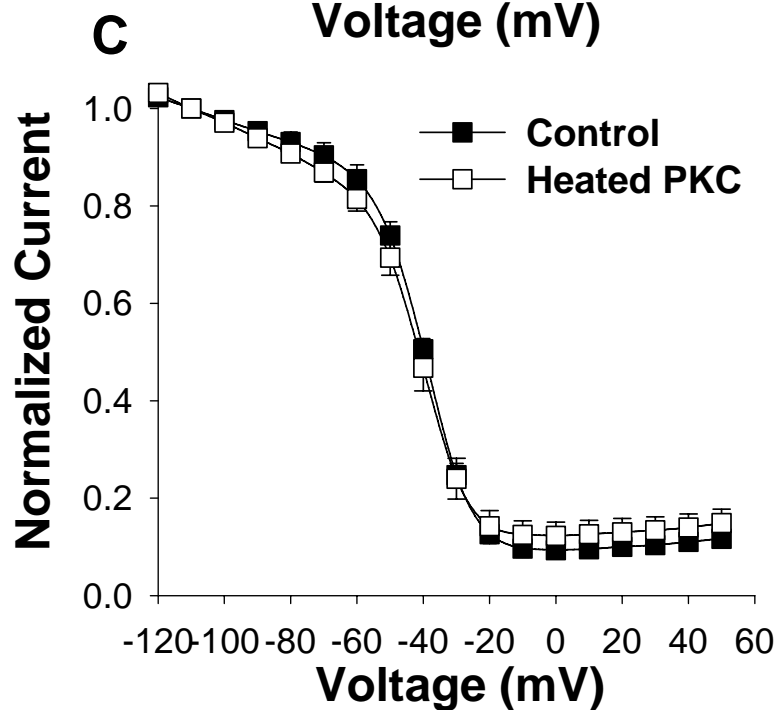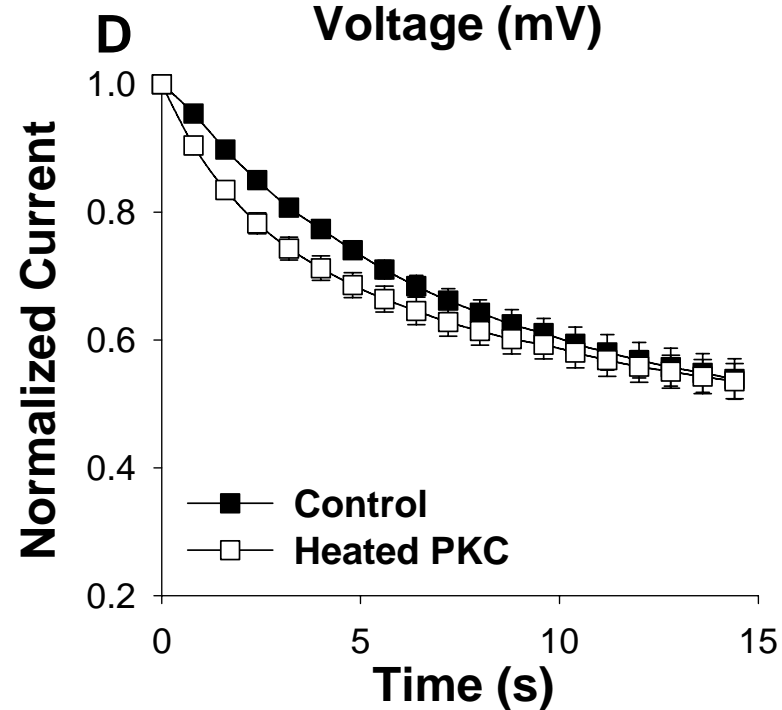

Supplement: 00144.2009_2.pdf [file 00144.2009_2.pdf]

### Supplement Figure 3

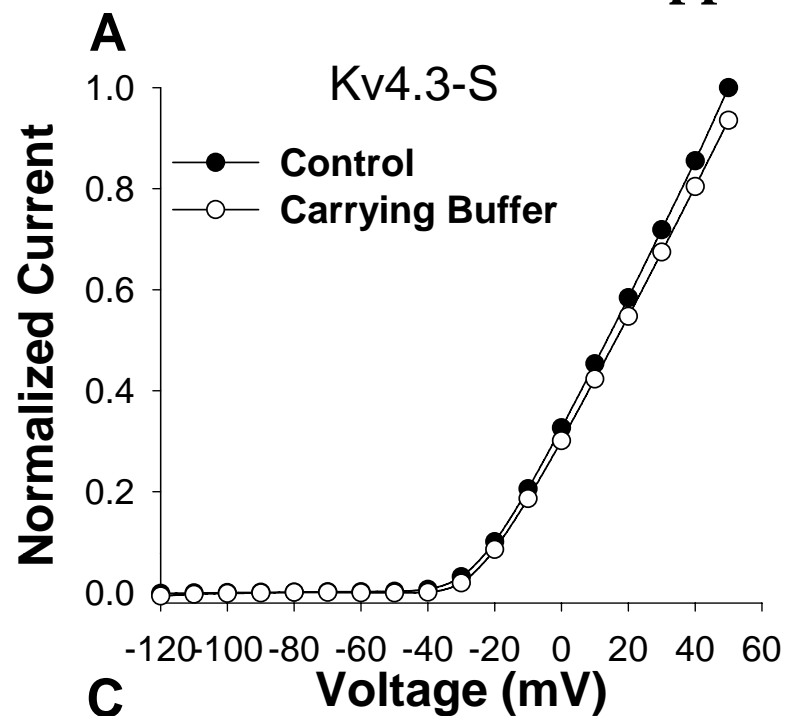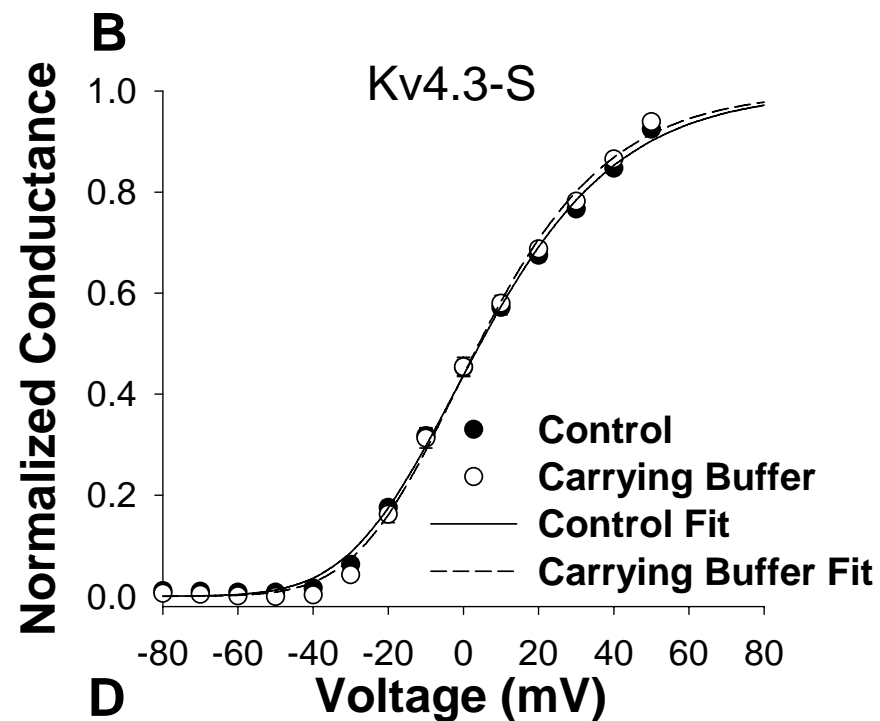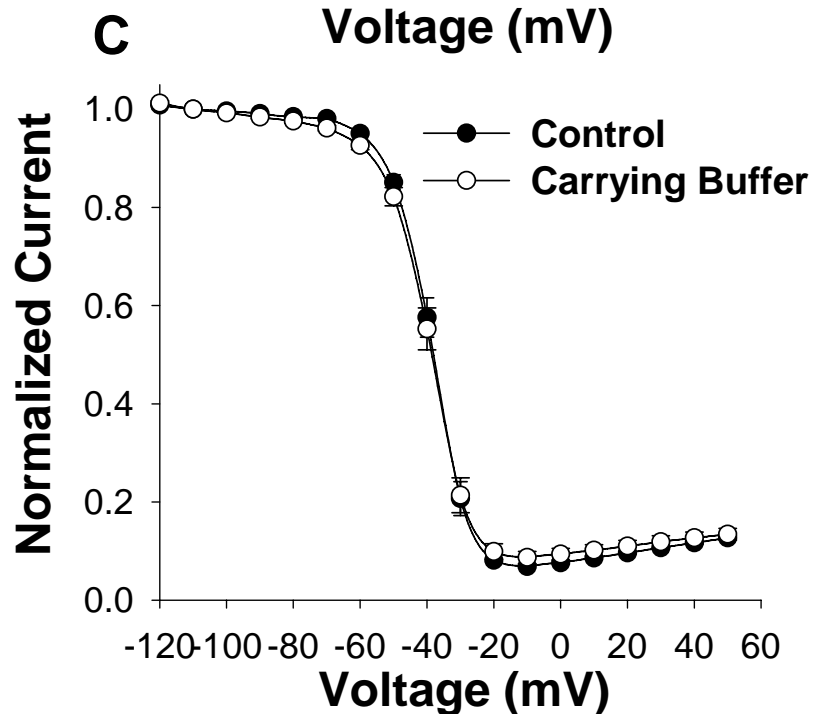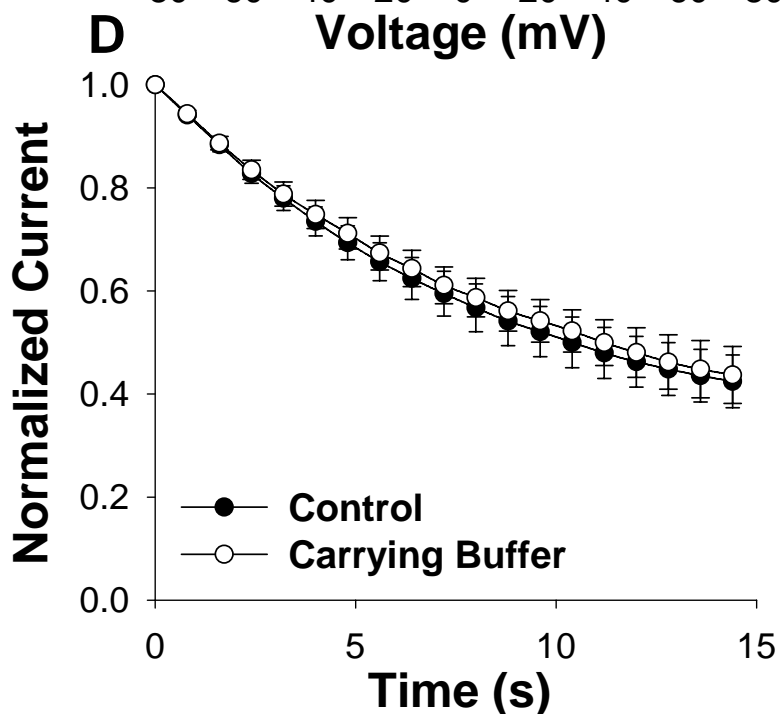

Supplement: 00144.2009_3.pdf [file 00144.2009_3.pdf]

## Supplement Figure 4

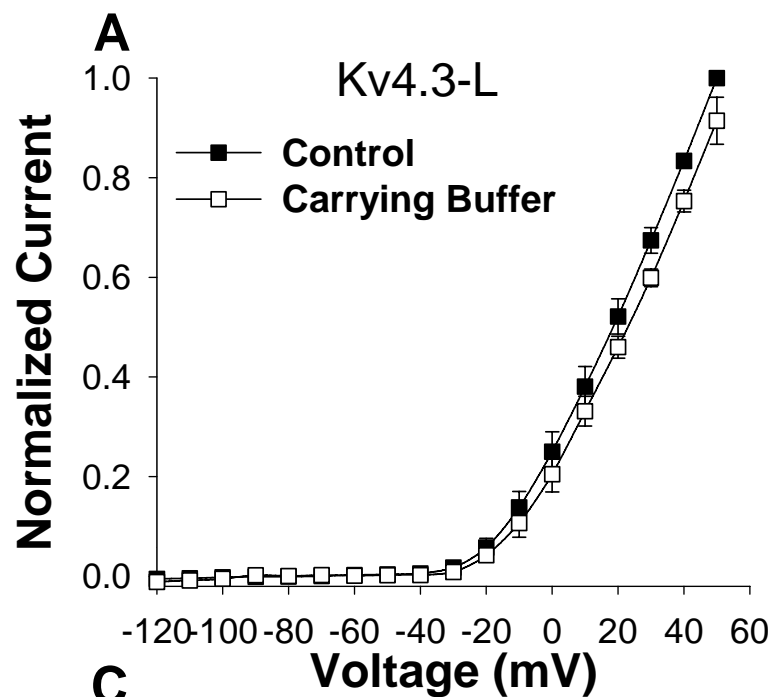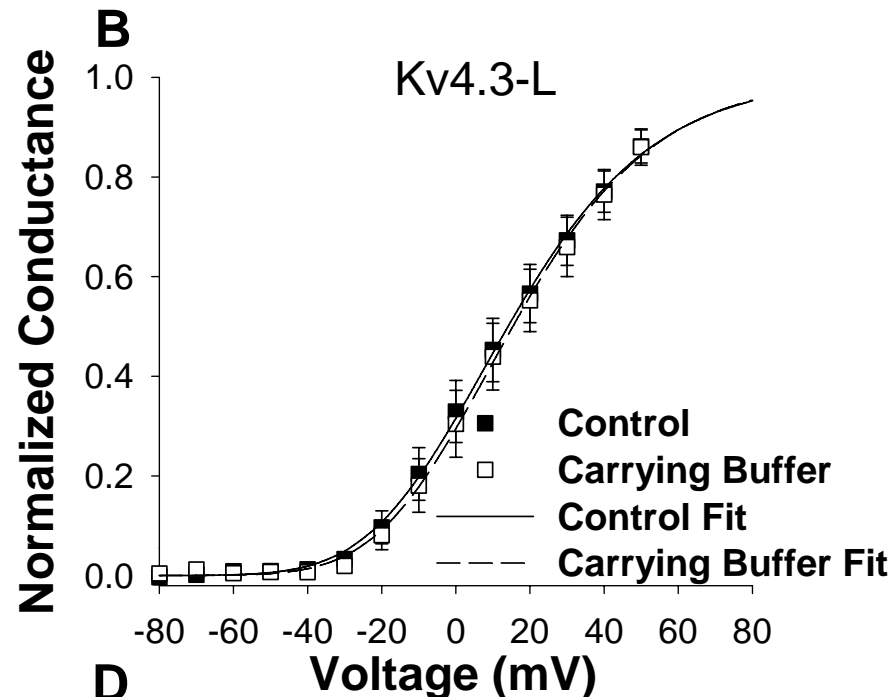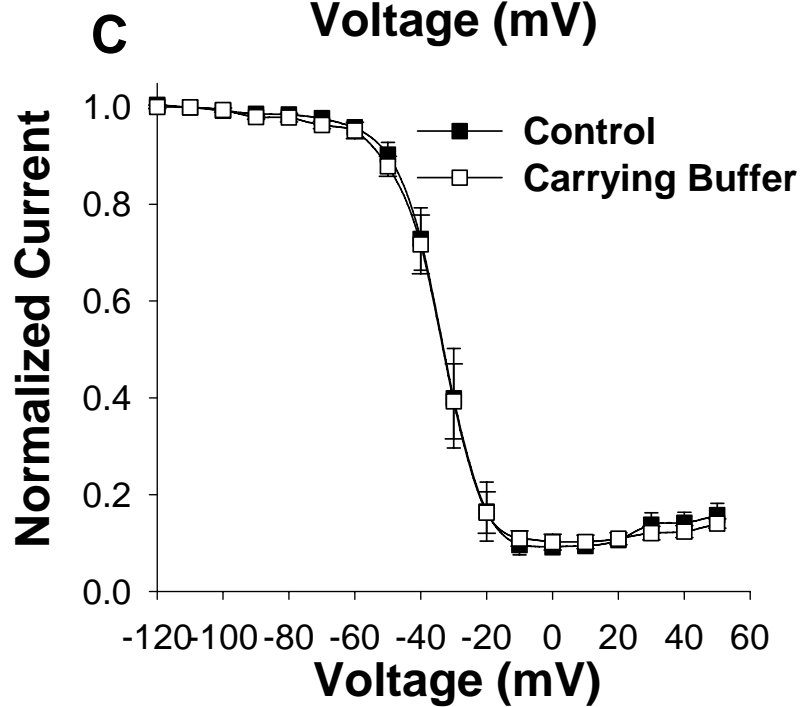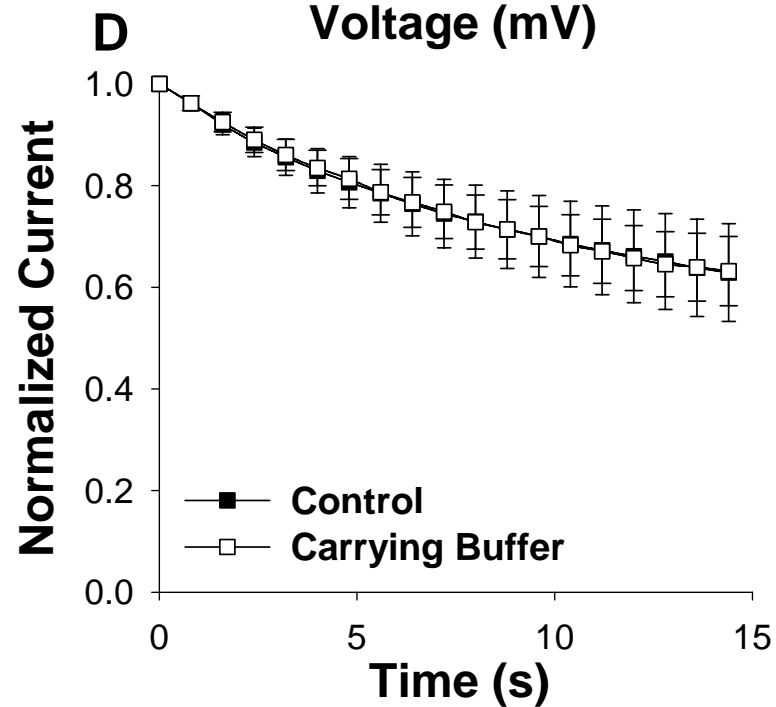

Supplement: 00144.2009_4.pdf [file 00144.2009_4.pdf]
